# Supplementary material for: Constructing a polycrystalline hybrid ternary CuS/Co 3 O 4 with supported graphitic nitride electrocatalyst for bifunctional water splitting reactions
Source: Royal Society of Chemistry journal article supplement (doi:10.1039/d4ta09031d), 2025-01-01
Supplement: d4ta09031d1.pdf [file d4ta09031d1.pdf]

## Constructing Polycrystalline Hybrid Ternary CuS/Co<sub>3</sub>O<sub>4</sub> with Supported Graphitic Nitride Electrocatalyst for Bifunctional Water Splitting Reactions

Imtiaz Ahmed<sup>a</sup> Zahir Abbas<sup>a</sup> and Shaikh M. Mobin<sup>\*,ab</sup>

<sup>a</sup>Department of Chemistry, Indian Institute of Technology Indore, Simrol Khandwa Road, 433552, India.

<sup>b</sup>Center for Advanced Electronics (CAE), Indian Institute of Technology Indore, Simrol Khandwa Road, 433552, India.

\* E-mail: xray@iiti.ac.in

| <i>Sr. No</i> | <i>Contents</i>                                                                                                                                                                                                                                                                                                                                        | <i>Page</i> |
|---------------|--------------------------------------------------------------------------------------------------------------------------------------------------------------------------------------------------------------------------------------------------------------------------------------------------------------------------------------------------------|-------------|
| 1.            | <b>Instrumentations</b>                                                                                                                                                                                                                                                                                                                                | S3          |
| 2.            | <b>Experimental Section</b>                                                                                                                                                                                                                                                                                                                            | S3-4        |
| 3.            | <b>Table S1</b> PXRD Rietveld refined structural information of Co <sub>3</sub> O <sub>4</sub> , CuS, binary composite and ternary composite system.                                                                                                                                                                                                   | S4-6        |
| 4.            | <b>Fig. S1:</b> (a-c) FESEM images of CuS pristine materials.                                                                                                                                                                                                                                                                                          | S6          |
| 5.            | <b>Fig. S2:</b> (a-c) FESEM images of Co <sub>3</sub> O <sub>4</sub> pristine materials.                                                                                                                                                                                                                                                               | S6          |
| 6.            | <b>Fig. S3:</b> ATR-FTIR spectra of ternary, binary and pristine Co <sub>3</sub> O <sub>4</sub> , CuS and g-C <sub>3</sub> N <sub>4</sub> .                                                                                                                                                                                                            | S7          |
| 7.            | <b>Fig. S4.</b> XPS survey spectra of ternary nanostructure.                                                                                                                                                                                                                                                                                           | S7          |
| 8.            | <b>Table S2.</b> Mass activity results of ternary binary composite and all other pristine electrocatalyst.                                                                                                                                                                                                                                             | S7          |
| 9.            | Electrochemical surface area:                                                                                                                                                                                                                                                                                                                          | S8          |
| 10.           | <b>Fig. S5.</b> Cyclic voltammetry curves of (a) pristine Co <sub>3</sub> O <sub>4</sub> (b) pristine CuS (c) g-C <sub>3</sub> N <sub>4</sub> composite (d-f) are their corresponding plot of J <sub>a</sub> and J <sub>c</sub> against scan rate for the determination of double layer capacitance (C <sub>dl</sub> ) of the catalysts, respectively. | S8          |

|     |                                                                                                                                                                                                                                                          |        |
|-----|----------------------------------------------------------------------------------------------------------------------------------------------------------------------------------------------------------------------------------------------------------|--------|
| 11. | <b>Fig. S6.</b> ECSA Normalization from LSV in 1M KOH for OER.                                                                                                                                                                                           | S9     |
| 12. | <b>Fig. S7.</b> TOF from LSV at voltage of 1.70 V of ternary, binary, $\text{Co}_3\text{O}_4$ CuS and g- $\text{C}_3\text{N}_4$ only in 1M KOH for OER.                                                                                                  | S9     |
| 13. | <b>Fig. S8.</b> CV curves of ternary, binary, $\text{Co}_3\text{O}_4$ , CuS and g- $\text{C}_3\text{N}_4$ in 1 M KOH (pH ~ 13.8) solution in a given potential range of 0.2 V to 0.3 V (vs RHE) at a scan rate of 40 mV/s to enumerate the active sites. | S10    |
| 14. | <b>Table S3.</b> Active sites ( $\tau$ ) and TOF results of ternary binary, $\text{Co}_3\text{O}_4$ , CuS and g- $\text{C}_3\text{N}_4$ electrocatalyst.                                                                                                 | S10    |
| 15. | <b>Table S4.</b> Comparison of OER and HER activity of ternary nanostructure with some reported copper and cobalt based catalysts in an alkaline medium and acidic medium.                                                                               | S11-12 |
| 16. | <b>Table S5.</b> Comparison of OER and HER chrono and LSV stability of some reported copper and cobalt based catalysts in an alkaline medium and acidic medium.                                                                                          | S12    |
| 17. | <b>Fig. S9:</b> Polarization curves (LSV) plot, representing the overpotential at higher current density (100 mA/cm <sup>2</sup> ) for both (a) HER and (b) OER for the electrocatalyst.                                                                 | S13    |
| 18. | <b>Most Possible Overall HER pathway:</b>                                                                                                                                                                                                                | S13    |
| 19. | <b>Most Possible Overall OER pathway:</b>                                                                                                                                                                                                                | S14    |
| 20. | <b>Fig. S10:</b> Post catalytic XRD and FESEM analysis of ternary electrocatalyst after chronoamperometric stability test in 1 M KOH.                                                                                                                    | S14    |
| 21. | <b>Fig. S11:</b> Post catalytic mapping analysis of ternary electrocatalyst after chronoamperometric stability test in 1 M KOH.                                                                                                                          | S15    |
| 22. | <b>Fig. S12:</b> Post catalytic FTIR analysis of ternary electrocatalyst after chronoamperometric stability test in 1 M KOH.                                                                                                                             | S 15   |
| 23. | <b>Reference</b>                                                                                                                                                                                                                                         | S16    |

## **Instrumentation:**

All the reagents and solvents were purchased from a commercial source without any further purification. For the Powder X-ray diffraction (PXRD) analysis Cu K $\alpha$  (0.154 nm) monochromatic radiation was used with a Rigaku Smart Lab X-ray diffractometer. X-ray photoelectron spectroscopy (XPS) measurements were carried out with a Kratos Axis Ultra system, equipped with a monochromatic AlK $\alpha$  X-ray source. The survey spectra were measured with 80 eV pass energy and 1 eV step size whereas with the high-resolution spectra 20 eV pass energy and 100 mV step size was used. All XPS measurements were performed using the charge neutralizer. The morphologies were investigated by a Supra55 Zeiss field emission scanning electron microscope (FESEM) and high-resolution transmission electron microscopy (HR-TEM) was performed using (TEM, JEM F200) at an operating voltage of 300 kV. The attenuated total reflectance Fourier transform infrared (ATR-FTIR) spectra were recorded with a Bruker Alpha II system over the wavenumber range of 4000–400 cm<sup>-1</sup>. All electrochemical measurements were performed with Metrohm Autolab (PGSTAT-204N) single channel potentiostat/galvanostat using NOVA 2.1.5 setup software.

## **EXPERIMENTAL SECTION**

**Materials:** Copper (II) chloride (CuCl<sub>2</sub>) were obtained SRL, Cobalt (II) nitrate hexahydrate (Co(NO<sub>3</sub>)<sub>2</sub>·6H<sub>2</sub>O), ethanol (AR grade 99.9%), potassium hydroxide (AR grade KOH), Thiourea (CS(NH<sub>2</sub>)<sub>2</sub>) and melamine (C<sub>3</sub>N<sub>3</sub>(NH<sub>2</sub>)<sub>3</sub>) were obtained from Spectrochem. 5% Nafion™ 117 solution IrO<sub>2</sub> and Pt/C and was bought from Sigma-Aldrich. Carbon cloth was purchased from Global-Tech India Pvt Ltd. for electrode preparation. The compounds were kept in a desiccated location and utilized without subsequent purification.

**Synthesis Procedure of CuS:** Synthesis of pristine CuS was carried out by preparing two different suspensions, 0.51g (3.69 mmol.) in 10 mL of ethylene glycol in a glass beaker with stirring to form solution I and thiourea 0.5 g (6.57 mmol.) in 15 ml DI H<sub>2</sub>O in another beaker to form solution II. Solution II was slowly dropped into solution I with continuous stirring and kept the reaction mixture under continuous stirring for 30 min at 40 °C. The entire reaction mixture was transferred into a Teflon-lined stainless-steel autoclave and subjected to a hydrothermal reaction at 160°C for 12 hours. After the reaction, the resulting product was washed multiple times with deionized water (DI H<sub>2</sub>O) and ethanol to remove any impurities. Finally, the obtained sample was kept on drying for overnight at 70 °C and then used for further

binary and ternary material synthesis. The schematic representation of the synthesis procedure for the flower-shaped CuS is illustrated in Scheme 1.

**Synthesis procedure of Co<sub>3</sub>O<sub>4</sub>:** To prepare Co<sub>3</sub>O<sub>4</sub>, 727.5 mg of cobalt nitrate hexahydrate (Co(NO<sub>3</sub>)<sub>2</sub>·6H<sub>2</sub>O) and 180 mg of CO(NH<sub>2</sub>)<sub>2</sub> was dissolved in 30 ml of distilled water under continuous magnetic stirring until a transparent wine color solution was formed. Then the reaction mixture was transferred in Teflon line-autoclave to treat it hydrothermally at 180 °C for 12 h. Subsequently the autoclave was cooled down to room temperature and the black precipitate was collected and washed with distilled water and ethanol respectively to remove the remnant and finally the sample was dried at 90 °C for further use. Finally it was calcinated at 300 °C for 3h to obtained the crystalline Co<sub>3</sub>O<sub>4</sub>.

**Synthesis of CuS@Co<sub>3</sub>O<sub>4</sub>:** The binary system was synthesized using a procedure similar to that used for the preparation of the ternary material, with the exception of the omission of g-C<sub>3</sub>N<sub>4</sub>.

**Synthesis procedure of g-C<sub>3</sub>N<sub>4</sub>:** g-C<sub>3</sub>N<sub>4</sub> was prepared via a simple calcination method. Melamine (C<sub>3</sub>N<sub>3</sub>(NH<sub>2</sub>)<sub>3</sub>) was calcinated by muffled furnace at 620 °C. The yellow powder obtained was used for further studies and research purpose.

**Table S1** PXRD Rietveld refined structural information of Co<sub>3</sub>O<sub>4</sub>, CuS, binary composite and ternary composite system.

| Sample<br>Composition          | Phases<br>with its<br>phase<br>fraction                                                                                                                                                                                                                                                                                | Atom<br>s | Wyckoff<br>site | Positional parameters |         |         | Occupan<br>cy | Bond length (Å)    |
|--------------------------------|------------------------------------------------------------------------------------------------------------------------------------------------------------------------------------------------------------------------------------------------------------------------------------------------------------------------|-----------|-----------------|-----------------------|---------|---------|---------------|--------------------|
|                                |                                                                                                                                                                                                                                                                                                                        |           |                 | x                     | y       | z       |               |                    |
| Co <sub>3</sub> O <sub>4</sub> | 100%<br>Pure<br>cubic<br>phase                                                                                                                                                                                                                                                                                         | Co1       | 8a              | 0.00000               | 0.00000 | 0.00000 | 1.00          | (Co1–O1) = 1.933   |
|                                |                                                                                                                                                                                                                                                                                                                        | O1        | 32e             | 0.38810               | 0.38810 | 0.38810 | 1.00          | (Co2–O1) = 1.92    |
|                                |                                                                                                                                                                                                                                                                                                                        | Co2       | 16d             | 0.62500               | 0.62500 | 0.62500 | 1.00          |                    |
|                                | Crystal system = Cubic, lattice parameters: a = b = c = 8.08013 Å; α = β = γ = 90°; cell volume = 527.539 Å <sup>3</sup> , space group = Fd-3m (SG#227).<br>R-Factors: R <sub>p</sub> = 1.22, R <sub>wp</sub> = 1.53, R <sub>exp</sub> = 1.51, R <sub>Bragg</sub> = 2.63, R <sub>F</sub> = 3.63; χ <sup>2</sup> = 1.02 |           |                 |                       |         |         |               |                    |
| 93.4%<br>Hexago                |                                                                                                                                                                                                                                                                                                                        | Cu1       | 4f              | 0.33333               | 0.66667 | 0.10666 | 1.00          | (Cu1–S1) = 2.32220 |
|                                |                                                                                                                                                                                                                                                                                                                        | Cu2       | 2d              | 0.33333               | 0.66667 | 0.75000 | 1.00          | (Cu1–S2) = 2.3484  |
|                                |                                                                                                                                                                                                                                                                                                                        | S1        | 4e              | 0.00000               | 0.00000 | 0.05965 | 1.00          | (Cu2–S2) = 2.19076 |

|                                                                                                                                                                                                                                                    |                                                                                                                                                                                                                                                                                                                                                                            |                                                                                                                                                                                                                                                                                                                                   |         |         |         |         |                    |                    |
|----------------------------------------------------------------------------------------------------------------------------------------------------------------------------------------------------------------------------------------------------|----------------------------------------------------------------------------------------------------------------------------------------------------------------------------------------------------------------------------------------------------------------------------------------------------------------------------------------------------------------------------|-----------------------------------------------------------------------------------------------------------------------------------------------------------------------------------------------------------------------------------------------------------------------------------------------------------------------------------|---------|---------|---------|---------|--------------------|--------------------|
| CuS                                                                                                                                                                                                                                                | nal<br>CuS<br>phase                                                                                                                                                                                                                                                                                                                                                        | S2                                                                                                                                                                                                                                                                                                                                | 2c      | 0.33333 | 0.66667 | 0.25000 | 1.00               |                    |
|                                                                                                                                                                                                                                                    | Crystal system = Hexagonal, lattice parameters: $a = b = 3.79449 \text{ \AA}$ , $c = 16.38446 \text{ \AA}$ ; $\alpha = \beta = 90^\circ$ , $\gamma = 120^\circ$ ; cell volume = $204.288 \text{ \AA}^3$ , space group = $P_{63}/mmc$ (SG #1194).<br><br>R-Factors: $R_p = 1.73$ , $R_{wp} = 2.31$ , $R_{exp} = 1.82$ , $R_{Bragg} = 1.25$ , $R_F = 1.14$ ; $\chi^2 = 1.60$ |                                                                                                                                                                                                                                                                                                                                   |         |         |         |         |                    |                    |
|                                                                                                                                                                                                                                                    | 6.6%<br>Cubic<br>Cu <sub>1.8</sub> S<br>phase                                                                                                                                                                                                                                                                                                                              | Cu1                                                                                                                                                                                                                                                                                                                               | 8c      | 0.00000 | 0.00000 | 0.00000 | 1.00               | (Cu1-S1) = 2.39996 |
|                                                                                                                                                                                                                                                    | Cu2                                                                                                                                                                                                                                                                                                                                                                        | 32f                                                                                                                                                                                                                                                                                                                               | 0.25000 | 0.25000 | 0.25000 | 0.496   | (Cu2-S1) = 2.26436 |                    |
|                                                                                                                                                                                                                                                    | S1                                                                                                                                                                                                                                                                                                                                                                         | 4a                                                                                                                                                                                                                                                                                                                                | 0.32527 | 0.32527 | 0.32527 | 0.38    |                    |                    |
| Crystal system = Cubic, lattice parameters: $a = b = c = 5.54206 \text{ \AA}$ ; $\alpha = \beta = \gamma = 90^\circ$ ; cell volume = $170.221 \text{ \AA}^3$ , space group = $Fm-3m$ (SG#225).<br><br>R-Factors: $R_{Bragg} = 0.56$ , $R_F = 2.31$ |                                                                                                                                                                                                                                                                                                                                                                            |                                                                                                                                                                                                                                                                                                                                   |         |         |         |         |                    |                    |
| binary<br>composite<br>system                                                                                                                                                                                                                      | 46.4%<br>cubic<br>Co <sub>3</sub> O <sub>4</sub><br>phase                                                                                                                                                                                                                                                                                                                  | Crystal system = Cubic, lattice parameters: $a = b = c = 8.08710 \text{ \AA}$ ; $\alpha = \beta = \gamma = 90^\circ$ ; cell volume = $528.907 \text{ \AA}^3$ , space group = $Fd-3m$ (SG#227).<br><br>R-Factors: $R_p = 1.41$ , $R_{wp} = 1.77$ , $R_{exp} = 1.30$ , $\chi^2 = 1.84$ ,<br><br>$R_{Bragg} = 42.4$ , $R_F = 51.9$ . |         |         |         |         |                    |                    |
|                                                                                                                                                                                                                                                    | 44.5%<br>Hexagonal<br>CuS<br>phase                                                                                                                                                                                                                                                                                                                                         | Crystal system = Hexagonal, lattice parameters: $a = b = 3.79297 \text{ \AA}$ , $c = 16.36940 \text{ \AA}$ ; $\alpha = \beta = 90^\circ$ , $\gamma = 120^\circ$ ; cell volume = $203.950 \text{ \AA}^3$ , space group = $P_{63}/mmc$ (SG #1194).<br><br>R-Factors: $R_{Bragg} = 28.8$ , $R_F = 27.5$ .                            |         |         |         |         |                    |                    |
|                                                                                                                                                                                                                                                    | 9.1%<br>Cubic<br>Cu <sub>1.8</sub> S<br>phase                                                                                                                                                                                                                                                                                                                              | Crystal system = Cubic, lattice parameters: $a = b = c = 5.54412 \text{ \AA}$ ; $\alpha = \beta = \gamma = 90^\circ$ ; cell volume = $170.411 \text{ \AA}^3$ , space group = $Fm-3m$ (SG#225).<br><br>R-Factors: $R_{Bragg} = 23.5$ , $R_F = 70.1$                                                                                |         |         |         |         |                    |                    |
| CuS/Co <sub>3</sub> O <sub>4</sub> @<br>g-C <sub>3</sub> N <sub>4</sub><br>composite<br>system                                                                                                                                                     | 39.4%<br>cubic<br>Co <sub>3</sub> O <sub>4</sub><br>phase                                                                                                                                                                                                                                                                                                                  | Crystal system = Cubic, lattice parameters: $a = b = c = 8.12143 \text{ \AA}$ ; $\alpha = \beta = \gamma = 90^\circ$ ; cell volume = $535.671 \text{ \AA}^3$ , space group = $Fd-3m$ (SG#227).<br><br>R-Factors: $R_p = 1.39$ , $R_{wp} = 1.77$ , $R_{exp} = 1.73$ , $\chi^2 = 1.05$ ,<br><br>$R_{Bragg} = 5.18$ , $R_F = 5.92$ . |         |         |         |         |                    |                    |

|                                                    |                                                                                                                                                                                                                                                                                                             |
|----------------------------------------------------|-------------------------------------------------------------------------------------------------------------------------------------------------------------------------------------------------------------------------------------------------------------------------------------------------------------|
| 37.6%<br>Hexagonal<br>CuS<br>phase                 | Crystal system = Hexagonal, lattice parameters: $a = b = 3.79642 \text{ \AA}$ , $c = 16.41605 \text{ \AA}$ ; $\alpha = \beta = 90^\circ$ , $\gamma = 120^\circ$ ; cell volume = $204.902 \text{ \AA}^3$ , space group = $P_{63}/mmc$ (SG #1194).<br><br>R-Factors: $R_{\text{Bragg}} = 4.39$ , $R_F = 4.97$ |
| 23%<br>Cubic<br>$\text{Cu}_{1.8}\text{S}$<br>phase | Crystal system = Cubic, lattice parameters: $a = b = c = 5.54669 \text{ \AA}$ ; $\alpha = \beta = \gamma = 90^\circ$ ; cell volume = $170.648 \text{ \AA}^3$ , space group = $Fm-3m$ (SG#225).<br><br>R-Factors: $R_{\text{Bragg}} = 5.28$ , $R_F = 13.2$                                                   |

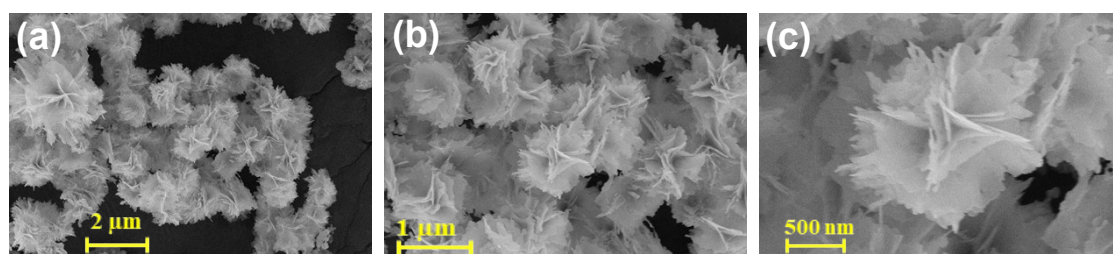

**Fig. S1:** (a-c) FESEM images of CuS pristine materials.

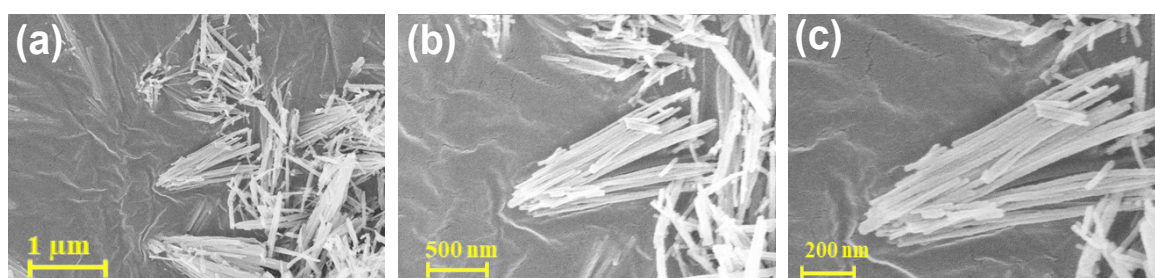

**Fig. S2:** (a-c) FESEM images of  $\text{Co}_3\text{O}_4$  pristine materials.

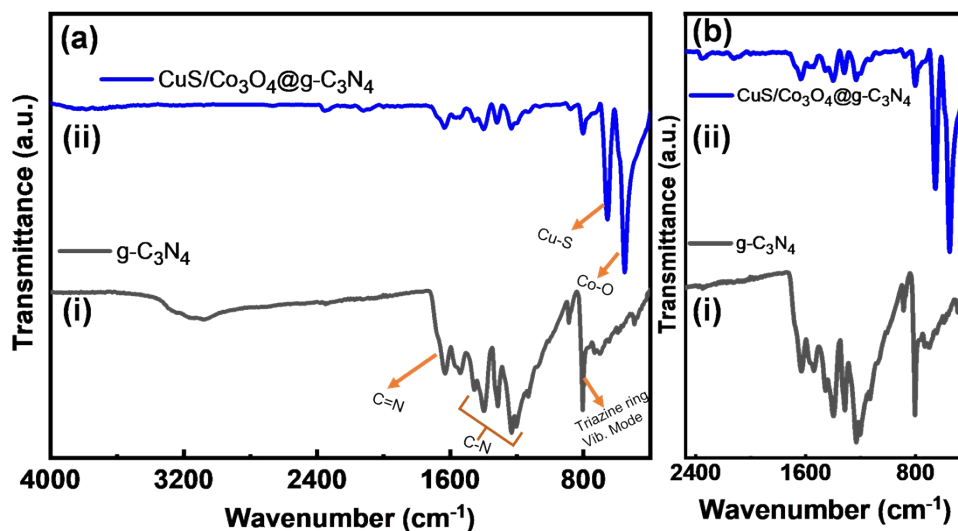

Fig. S3: ATR-FTIR spectra of ternary, binary and pristine  $\text{Co}_3\text{O}_4$ , CuS and  $\text{g-C}_3\text{N}_4$ .

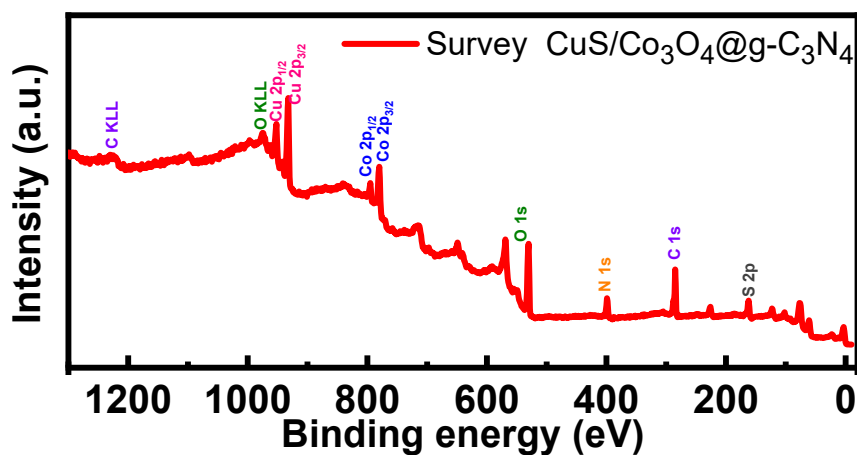

Fig. S4. XPS survey spectra of  $\text{CuS/Co}_3\text{O}_4@\text{g-C}_3\text{N}_4$  ternary nanostructure.

Table S2. Mass activity results of ternary binary composite and all other pristine electrocatalyst.

| S.No | Mass Activity                                      |        |        |
|------|----------------------------------------------------|--------|--------|
|      | Electrocatalysts                                   | OER    | HER    |
| 1    | Bare CC                                            | 8.99   | 4.9    |
| 2    | $\text{g-C}_3\text{N}_4$                           | 22.24  | 5.21   |
| 3    | CuS                                                | 38.79  | 9.35   |
| 4    | $\text{Co}_3\text{O}_4$                            | 78.52  | 37.42  |
| 5    | $\text{CuS/Co}_3\text{O}_4$                        | 234.12 | 86.78  |
| 6    | $\text{CuS/Co}_3\text{O}_4@\text{g-C}_3\text{N}_4$ | 462.56 | 165.43 |

## Electrochemical surface area (ECSA):

The electrochemically active surface area (ECSA) is proportional to the electrochemical double layer capacitance ( $C_{dl}$ ) and the ECSA can be calculated using the following equation.

$$ECSA = C_{dl}/C_s \dots \dots \dots (2)$$

Where  $C_s$  is the specific capacitance of flat working electrode and its value is  $40 \mu\text{F cm}^{-2}$  ECSA for the flat electrode.<sup>1,2</sup> The double-layer capacitance ( $C_{dl}$ ) is calculated from the slope of anodic current density ( $J_a$ ), cathodic current density ( $J_c$ ) vs scan rate plot. The slope is directly proportion to the  $C_{dl}$  value.

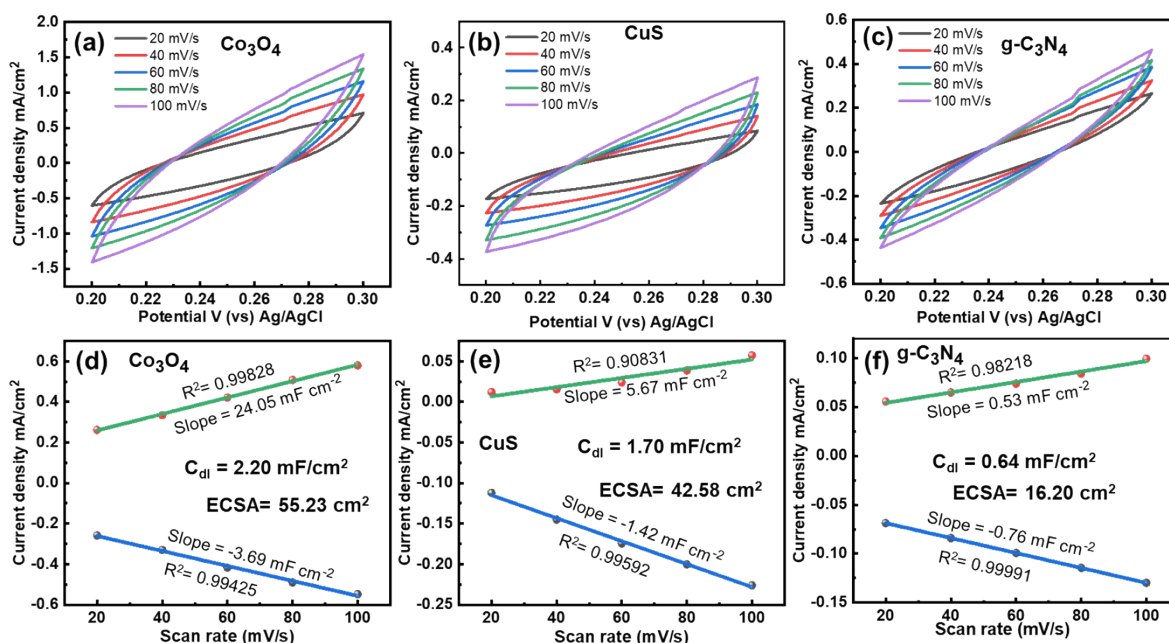

**Fig. S5.** Cyclic voltammograms of (a) pristine  $\text{Co}_3\text{O}_4$  (b) pristine  $\text{CuS}$  (c)  $\text{g-C}_3\text{N}_4$  composite (d-f) are their corresponding plot of  $J_a$  and  $J_c$  against scan rate for the determination of double layer capacitance ( $C_{dl}$ ) of the catalysts, respectively.



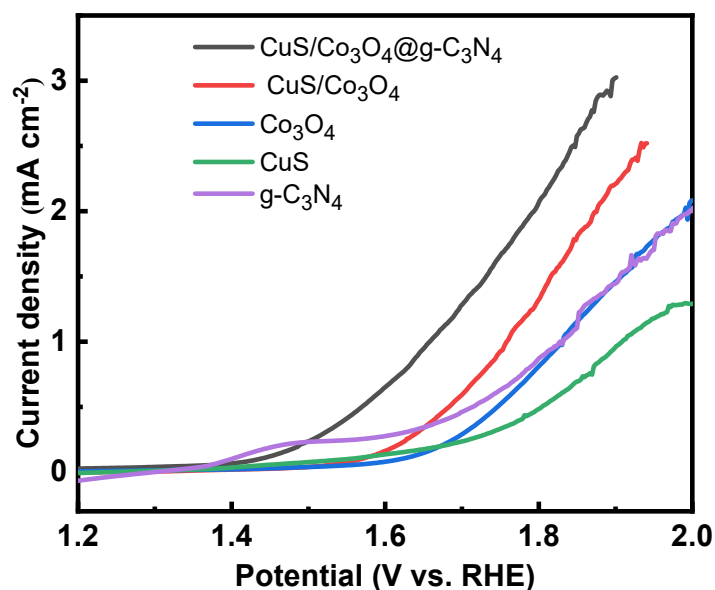

**Fig. S6.** ECSA Normalization from LSV in 1M KOH for OER.

Turnover Frequency (TOF) of all the electrocatalysts by using the following relation:

$$TOF = \frac{J \times NA}{n \times F \times \tau} \dots\dots (3)$$

Complete details are of catalysts of active sites ( $\tau$ ) TOF and are presented in textual part of manuscript and in Table S3 Fig. S7 & S8:

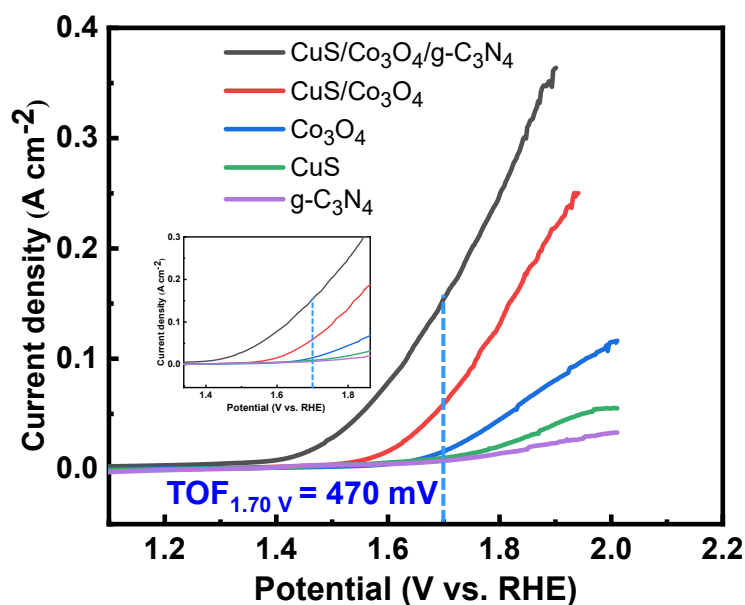

**Fig. S7.** TOF from LSV at voltage of 1.70 V (470 mV) and current density (in A/cm<sup>2</sup>) of CuS/Co<sub>3</sub>O<sub>4</sub>@g-C<sub>3</sub>N<sub>4</sub>, CuS/Co<sub>3</sub>O<sub>4</sub>, Co<sub>3</sub>O<sub>4</sub>, CuS and g-C<sub>3</sub>N<sub>4</sub> only in 1M KOH for OER.

Active sites ( $\tau$ ) was calculated by the following equation:

$$\tau = \frac{\text{area of the } C_{dl}}{\text{Scan rate} \times 1.601 \times 10^{-19}} \dots\dots (1)$$

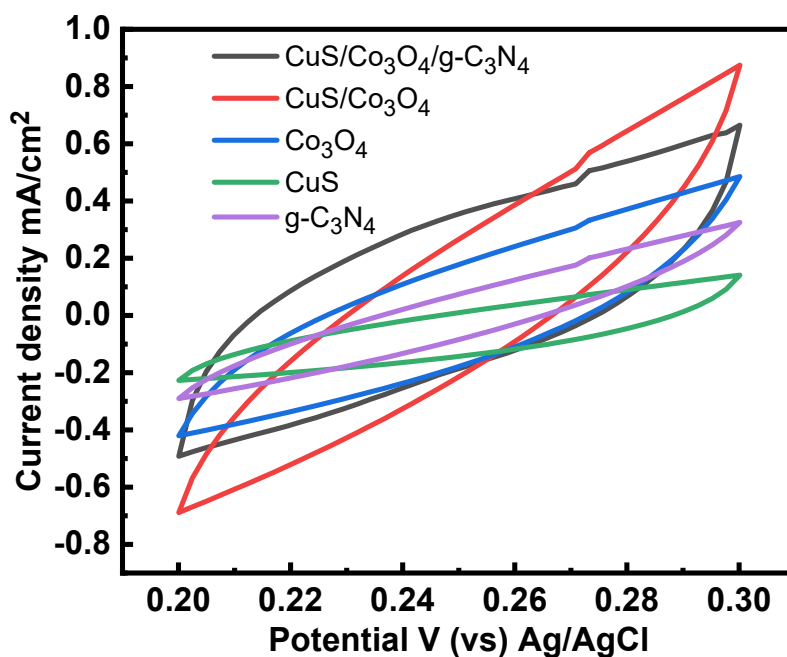

**Fig. S8.** CV curves of CuS/Co<sub>3</sub>O<sub>4</sub>@g-C<sub>3</sub>N<sub>4</sub>, CuS/Co<sub>3</sub>O<sub>4</sub>, Co<sub>3</sub>O<sub>4</sub> CuS and g-C<sub>3</sub>N<sub>4</sub> in 1 M KOH (pH ~ 13.8) solution in a given potential range of 0.2 V to 0.3 V (vs RHE) at a scan rate of 40 mV/s to enumerate the active sites.

**Table S3.** Active sites ( $\tau$ ) and TOF results of CuS/Co<sub>3</sub>O<sub>4</sub>@g-C<sub>3</sub>N<sub>4</sub> CuS/Co<sub>3</sub>O<sub>4</sub>, Co<sub>3</sub>O<sub>4</sub> CuS and g-C<sub>3</sub>N<sub>4</sub> electrocatalyst.

| S.No | Mass Activity                                                       |                         |                         |
|------|---------------------------------------------------------------------|-------------------------|-------------------------|
|      | Electrocatalysts                                                    | Active sites ( $\tau$ ) | TOF                     |
| 1    | CuS/Co <sub>3</sub> O <sub>4</sub> @g-C <sub>3</sub> N <sub>4</sub> | $6.944 \times 10^{15}$  | $0.3438 \text{ s}^{-1}$ |
| 2    | CuS/Co <sub>3</sub> O <sub>4</sub>                                  | $5.854 \times 10^{15}$  | $0.1611 \text{ s}^{-1}$ |
| 3    | Co <sub>3</sub> O <sub>4</sub>                                      | $4.228 \times 10^{15}$  | $0.1446 \text{ s}^{-1}$ |
| 4    | CuS                                                                 | $1.859 \times 10^{15}$  | $0.1101 \text{ s}^{-1}$ |
| 5    | g-C <sub>3</sub> N <sub>4</sub>                                     | $1.865 \times 10^{15}$  | $0.0511 \text{ s}^{-1}$ |

**Table S4.** Comparison of OER and HER activity of CuS/Co<sub>3</sub>O<sub>4</sub>@g-C<sub>3</sub>N<sub>4</sub> ternary nanostructure with some reported copper and cobalt based catalysts in an alkaline medium and acidic medium.

| Catalyst                                                                          | Method of catalyst synthesis            | Overpotential (mV) at 10 mA/cm <sup>2</sup> |       | Tafel slope (mV dec <sup>-1</sup> ) |                         | Electrolyte used |                                               | Reference |
|-----------------------------------------------------------------------------------|-----------------------------------------|---------------------------------------------|-------|-------------------------------------|-------------------------|------------------|-----------------------------------------------|-----------|
|                                                                                   |                                         | OER                                         | HER   | OER                                 | HER                     | OER              | HER                                           |           |
| Co <sub>3</sub> O <sub>4</sub> /NC/C                                              | Thermal Decomp.                         | .....                                       | 40    |                                     | 43 mV dec <sup>-1</sup> |                  | 1M KOH                                        | 3         |
| CuFeS <sub>2</sub> /rGO                                                           |                                         | 176                                         | 153   | 216                                 | 150                     | 1M KOH           | 1M KOH                                        | 4         |
| Co <sub>3</sub> O <sub>4</sub> /C                                                 | Hydrothermal Approach                   | 290                                         | ..... | 70                                  |                         | 0.1 M KOH        | .....                                         | 5         |
| g-C <sub>3</sub> N <sub>4</sub> /CeO <sub>2</sub> /Fe <sub>3</sub> O <sub>4</sub> | Hydrothermal Approach                   | 400                                         | 310   |                                     |                         | 1M KOH           | 1M KOH                                        | 6         |
| Ni@CuS/SGCN                                                                       | .....                                   | 380                                         |       | 178                                 |                         | 1M KOH           | 0.5 M H <sub>2</sub> SO <sub>4</sub>          | 7         |
| Co <sub>3</sub> O <sub>4</sub> @MoS <sub>2</sub>                                  | Hydrothermal Approach                   | 269                                         | 207   | 58                                  | 58                      | 1M KOH           | 1 M KOH & 0.5M H <sub>2</sub> SO <sub>4</sub> | 8         |
| rGO/MnO <sub>2</sub> /MoS <sub>2</sub>                                            | Hydrothermal Approach                   | 208                                         | 205   | 73.7                                | 76.13                   | 1M KOH           | 1M KOH                                        | 9         |
| Co <sub>3</sub> O <sub>4</sub> @NiO                                               | Chemical growth method then calcination | 330                                         | ..... | 101                                 | .....                   | 1M KOH           | .....                                         | 10        |
| Cu <sub>2</sub> S NRs@CoS*                                                        | .....                                   | 275                                         | 54    | 237                                 | 121                     | 1M KOH           | 1M KOH                                        | 11        |
| NiO@MoO <sub>3</sub> /VC                                                          | Hydrothermal Approach                   | 280                                         | ..... | 64.5                                | .....                   | 1M KOH           | .....                                         | 12        |
| CoTe/MnO <sub>2</sub> /BN                                                         | Hydrothermal Approach                   | 273                                         | ..... | 81                                  | .....                   | 1M KOH           | .....                                         | 13        |
| ZnO/Co <sub>3</sub> O <sub>4</sub>                                                | Chemical Deposition                     | 294                                         | ..... | 49                                  | .....                   | 1M KOH           | .....                                         | 14        |
| RGO/MoS <sub>2</sub> /Pd                                                          | Hydrothermal Approach                   | 245                                         | 86    | 42                                  | 35.9                    | 1M KOH           | 1M KOH                                        | 15        |
| RuO <sub>2</sub> /Co <sub>3</sub> O <sub>4</sub>                                  | Co-precipitation                        | 305                                         | 89    | 69                                  | 91                      | 1M KOH           | 1 M KOH                                       | 16        |
| Co/Co <sub>3</sub> O <sub>4</sub>                                                 | Hydrother                               | .....                                       | 129*  | .....                               | 44                      | .....            | 1 M KOH                                       | 17        |

|                                                                                   |                              |            |           |            |           |               |                                          |                     |
|-----------------------------------------------------------------------------------|------------------------------|------------|-----------|------------|-----------|---------------|------------------------------------------|---------------------|
|                                                                                   | mal Approach                 |            |           |            |           |               |                                          |                     |
| Co <sub>3</sub> O <sub>4</sub> /MoO <sub>3</sub> /g-C <sub>3</sub> N <sub>4</sub> | Hydrothermal method          | 206        | 125       | 60         | 94        | 1M KOH        | 0.5 M H <sub>2</sub> SO <sub>4</sub>     | <b>18</b>           |
| Cu <sub>2</sub> S/MoS <sub>2</sub> /CF                                            | Hydrothermal method          | .....      | 91        | .....      | 41        |               | 1M KOH                                   | <b>19</b>           |
| <b>CuS/Co<sub>3</sub>O<sub>4</sub>@g-C<sub>3</sub>N<sub>4</sub></b>               | <b>Hydrothermal Approach</b> | <b>191</b> | <b>78</b> | <b>213</b> | <b>89</b> | <b>1M KOH</b> | <b>0.5 M H<sub>2</sub>SO<sub>4</sub></b> | <b>Present Work</b> |

Note: \* = Overpotential at 50 mA cm<sup>-2</sup>

**Table S5.** Comparison of OER and HER chrono and LSV stability of some reported copper and cobalt based catalysts in an alkaline medium and acidic medium.

| S. No | Catalysts                                                                         | Electrolytes<br>(HER/OER)                       | Chronoamperometry<br>Stability (Time in hours) |             | LSV<br>Polarization<br>Stability<br>(Cycles)  |                                               | References       |
|-------|-----------------------------------------------------------------------------------|-------------------------------------------------|------------------------------------------------|-------------|-----------------------------------------------|-----------------------------------------------|------------------|
|       |                                                                                   |                                                 | HER                                            | OER         | HER                                           | OER                                           |                  |
| 1     | Co <sub>3</sub> O <sub>4</sub> /NC/C                                              | 1M KOH                                          | 20 h                                           | 100 h       | .....                                         | 1 <sup>st</sup> & 2000 <sup>th</sup>          | 3                |
| 2     | g-C <sub>3</sub> N <sub>4</sub> /CeO <sub>2</sub> /Fe <sub>3</sub> O <sub>4</sub> | 1M KOH                                          | 14 h                                           | .....       | .....                                         | .....                                         | 6                |
| 3     | rGO/MnO <sub>2</sub> /MoS <sub>2</sub>                                            | 1M KOH                                          | 12 h                                           | 12 h        | ...                                           | ...                                           | 9                |
| 4     | Co <sub>3</sub> O <sub>4</sub> /MoO <sub>3</sub> /g-C <sub>3</sub> N <sub>4</sub> | 0.5 M H <sub>2</sub> SO <sub>4</sub> /1M KOH    | 24 h                                           | 24 h        | 1 <sup>st</sup> & 3000 <sup>th</sup>          | 1 <sup>st</sup> & 3000 <sup>th</sup>          | 17               |
| 5     | Cu <sub>2</sub> S NRs@CoS                                                         | 1M KOH                                          | 36 h                                           | 36 h        | .....                                         | .....                                         | 11               |
| 6     | NiO@MoO <sub>3</sub> /VC                                                          | 1M KOH                                          |                                                | 15 h        | .....                                         | 500 <sup>th</sup>                             | 12               |
| 7     | CoTe/MnO <sub>2</sub> /BN                                                         | 1M KOH                                          |                                                | 24 h        | .....                                         | 2500 <sup>th</sup>                            | 13               |
| 8     | Cu <sub>2</sub> S/MoS <sub>2</sub> /CF                                            | 1M KOH                                          | 4 h                                            | .....       | 1000 <sup>th</sup>                            | .....                                         | 19               |
| 9     | <b>CuS/Co<sub>3</sub>O<sub>4</sub>@g-C<sub>3</sub>N<sub>4</sub></b>               | <b>0.5 M H<sub>2</sub>SO<sub>4</sub>/1M KOH</b> | <b>40 h</b>                                    | <b>60 h</b> | <b>1<sup>st</sup> &amp; 2000<sup>th</sup></b> | <b>1<sup>st</sup> &amp; 2000<sup>th</sup></b> | <b>This Work</b> |

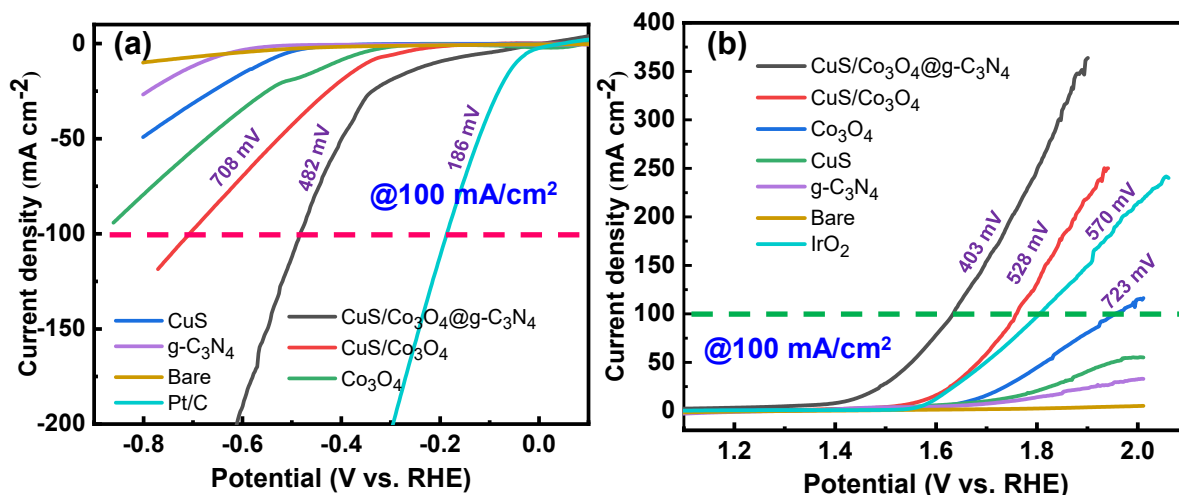

**Fig. S9:** Polarization curves (LSV) plot, representing the overpotential at higher current density ( $100 \text{ mA/cm}^2$ ) for both (a) HER and (b) OER for the electrocatalyst.

### Most Possible Overall HER pathway:

HER process proceeds through three principal steps and they are called as Volmer, the Heyrovsky, and the Tafel steps, in acidic medium.<sup>20-23</sup> Volmer reaction is associated with proton absorption which is a primary discharge step (Step 1). Heyrovsky step is the electrochemical desorption stage i.e., combination of a second proton with an adsorbed H atom of  $\text{H}_2$  gas (step 2) where Tafel step is a recombination step i.e., the combination of two nearby adsorbed H atoms to produce  $\text{H}_2$  gas (step 3).

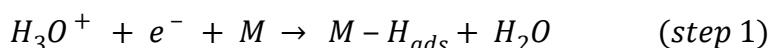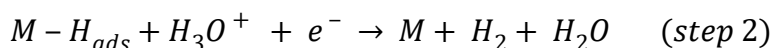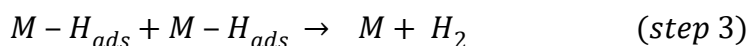

Where  $\text{H}_{\text{ads}}$  represents a hydrogen atom chemically adsorbed on an active site of the catalyst surface (M). If Volmer reaction is the rate-determining step, then the Tafel slope should be  $120 \text{ mV dec}^{-1}$ , and for the Heyrovsky process and Tafel process, the Tafel slope of  $40$  and  $30 \text{ mV dec}^{-1}$  should be obtained, respectively.<sup>23, 24</sup> So combinations of steps, i.e., Volmer-Heyrovsky or Volmer-Tafel pathway are required to produce molecular hydrogen in a complete HER process.

### Most Possible Overall OER pathway:

The most possible overall OER pathway and the overall OER pathway under basic condition is described in our revised manuscript accordingly. At initial stage, active sites are reacted with the  $\text{OH}^-$  anion of the alkaline medium at the catalyst surface and started to form adsorbed  $\text{OH}^-$  species (stage 1). Afterwards, the adsorbed  $\text{OH}$  species further react with another  $\text{OH}^-$  ions to generate  $\text{H}_2\text{O}$  and adsorbed atomic  $\text{O}^*$  and discharge an electron (stage 2). Then, an  $\text{OH}^-$  anion reacts with an adsorbed  $\text{O}^*$  atom to produce adsorbed  $\text{OOH}$  species (stage 3). Moreover, further reaction with extra  $\text{OH}^-$  anions generates adsorbed  $\text{O}_2$  and  $\text{H}_2\text{O}$  and after that adsorbed  $\text{O}_2$  molecules were discharged finally in the stage (stage 4). All the steps associated in the reaction mechanism have been portrayed as follows:

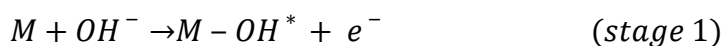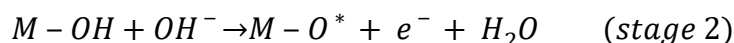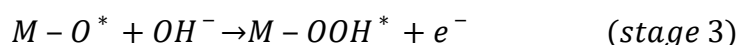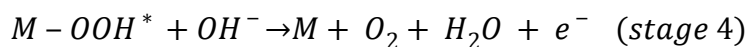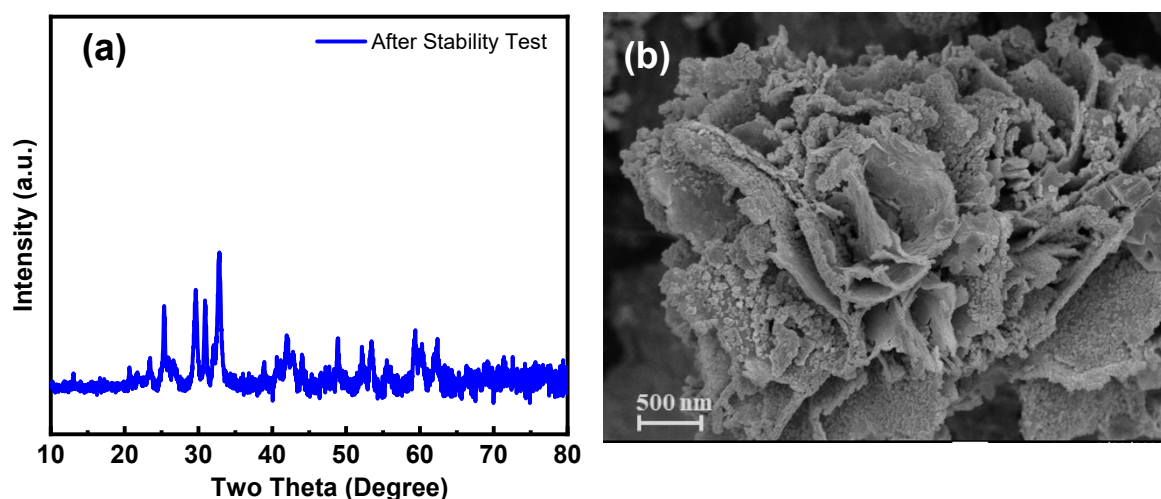

**Fig. S10:** Post catalytic XRD and FESEM analysis of  $\text{CuS}/\text{Co}_3\text{O}_4/\text{g-C}_3\text{N}_4$  electrocatalyst after chronoamperometric stability test in 1 M KOH.

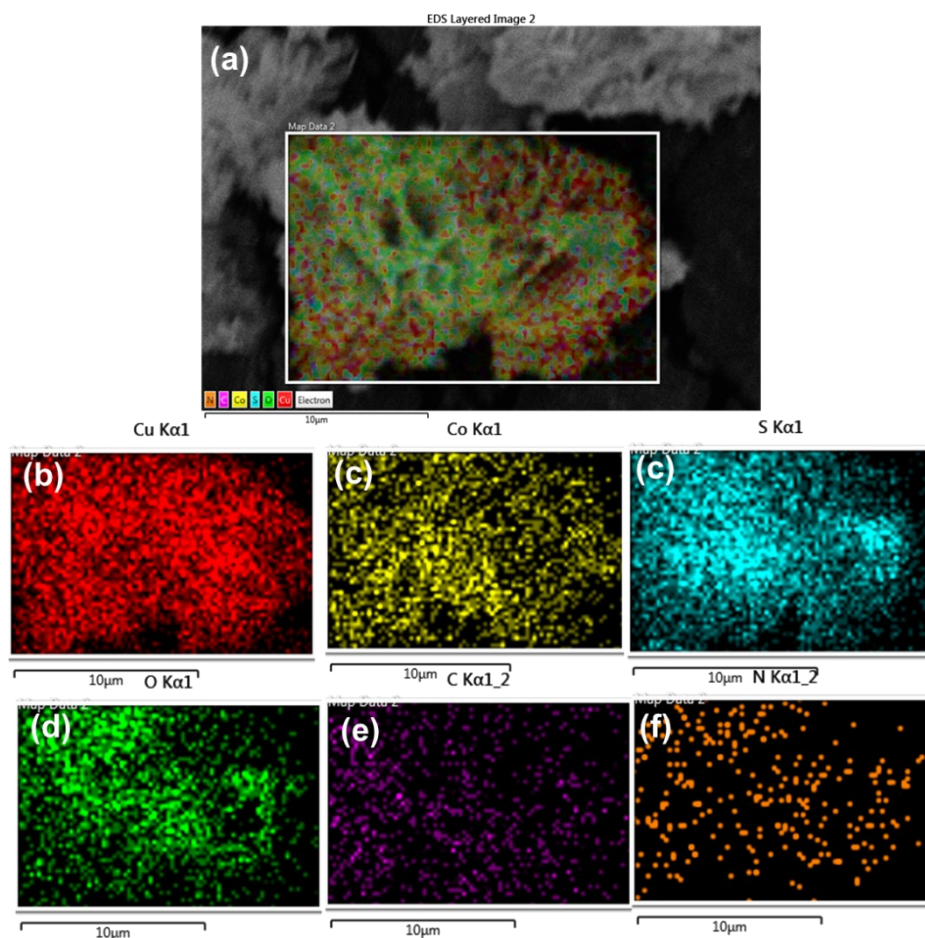

**Fig. S11:** Post catalytic mapping analysis of  $\text{CuS}/\text{Co}_3\text{O}_4@\text{g-C}_3\text{N}_4$  electrocatalyst after chronoamperometric stability test in 1 M KOH.

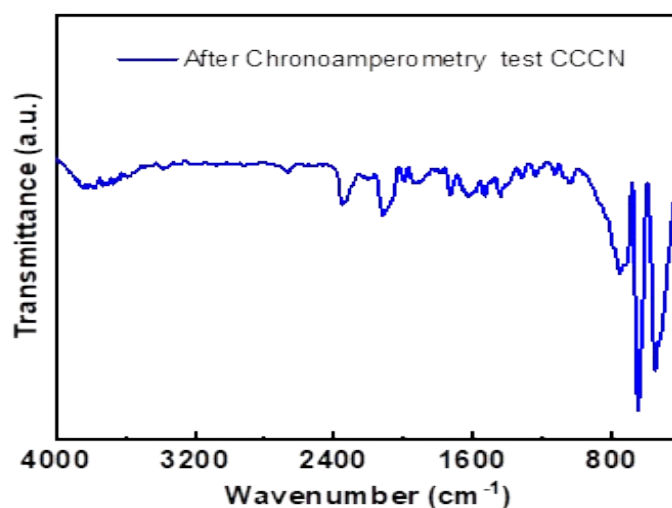

**Fig. S12:** Post catalytic ATR-FTIR of  $\text{CuS}/\text{Co}_3\text{O}_4@\text{g-C}_3\text{N}_4$  electrocatalyst after chronoamperometric stability test in 1 M KOH.

## References:

1. T. A. Ho, C. Bae, H. Nam, E. Kim, S. Y. Lee, J. H. Park, H. Shin *ACS Appl. Mater. Interfaces* 2018, **10**, 12807-12815.
2. Y. Li, F.-M. Li, X.-Y. Meng, S.-N. Li, J.-H. Zeng and Y. J. A. C. Chen, 2018, **8**, 1913-1920.
3. S. Du, Z. Ren, J. Zhang, J. Wu, W. Xi, J. Zhu and H. Fu, *Chem. Commun.*, 2015, **51**, 8066-8069.
4. S. Swathi, R. Yuvakkumar, G. Ravi, M. Thambidurai, H. D. Nguyen and D. Velauthapillai, *ACS Appl. Nano Mater.*, 2023, **6**, 6538-6549.
5. S. A. Needham, G. Wang, K. Konstantinov, Y. Tournayre, Z. Lao and H.-K. Liu, *Electrochem. and Solid State Lett.*, 2006, **9**, A315.
6. J. Rashid, N. Parveen, T. u. Haq, A. Iqbal, S. H. Talib, S. U. Awan, N. Hussain and M. Zaheer, *ChemCatChem*, 2018, **10**, 5587-5592.
7. M. Javed, M. A. Qamar, M. Shariq, I. A. Ahmed, K. B. Alziyadi, E. Almutib, A.-N. M. Alaghaz, R. Azooz and S. K. Ali, *J. of The Electrochem. Soc.*, 2023, **170**, 116506.
8. J. Liu, J. Wang, B. Zhang, Y. Ruan, H. Wan, X. Ji, K. Xu, D. Zha, L. Miao and J. Jiang, *J. Mater. Chem. A*, 2018, **6**, 2067-2072.
9. S. Denisdon, P. Senthil Kumar, C. Boobalan and G. Rangasamy, *Langmuir*, 2024, **40**, 17753-17766.
10. A. QayoomMugheri, U. Aftab, M. IshaqAbro, S. R. Chaudhry, L. Amaral and Z. H. Ibupoto, *Electrochim. Acta*, 2019, **306**, 9-17.
11. Q. Zhou, T.-T. Li, J. Wang, F. Guo and Y.-Q. Zheng, *Electrochim. Acta*, 2019, **296**, 1035-1041.
12. R. Illathvalappil, L. George and S. Kurungot, *ACS Appl. Energy Mater.* 2019, **2**, 4987-4998.
13. P. Rani, R. Biswas, A. Dutta and P. S. Alegaonkar, *Energy & Fuels*, 2024.
14. L. Zhang, H. Li, B. Yang, Y. Zhou, Z. Zhang and Y. Wang, *J. Solid State Electrochem.*, 2019, **23**, 3287-3297.
15. A. Pandey, A. Mukherjee, S. Chakrabarty, D. Chanda and S. Basu, *ACS Appl. Mater. & Interfaces*, 2019, **11**, 42094-42103.
16. H. Liu, G. Xia, R. Zhang, P. Jiang, J. Chen and Q. Chen, *RSC Adv.*, 2017.
17. X. Yan, L. Tian, M. He and X. Chen, *Nano Lett.*, 2015, **15**, 6015-6021.
18. I. Ahmed, R. Biswas, R. A. Patil, K. K. Halder, H. Singh, B. Banerjee, B. Kumar, Y.-R. Ma and K. K. Haldar, *ACS Appl. Nano Mater.*, 2021, **4**, 12672-12681.
19. X. Wang, J. Wang, X. Zhang, Q. Tian, M. Liu, N. Cai, Y. Xue, W. Chen, W. Li and F. Yu, *ChemCatChem*, 2019, **11**, 1354-1361.
20. N. Pentland, J. M. Bockris and E. Sheldon, *J. Electrochem. Soc.*, 1957, **104**, 182.
21. M. Basu, R. Nazir, C. Mahala, P. Fageria, S. Chaudhary, S. Gangopadhyay and S. Pande, *Langmuir*, 2017, **33**, 3178-3186.
22. B. Conway and B. Tilak, *Electrochim. Acta*, 2002, **47**, 3571-3594.
23. J. Xie, J. Zhang, S. Li, F. Grote, X. Zhang, H. Zhang, R. Wang, Y. Lei, B. Pan and Y. Xie, *J. Am. Chem. Soc.*, 2013, **135**, 17881-17888.
24. T. Hu, K. Bian, G. Tai, T. Zeng, X. Wang, X. Huang, K. Xiong and K. Zhu, *The J. Phys. Chem. C*, 2016, **120**, 25843-25850.
